# Supplementary material
Source: PubMed Central journal article supplement (PMC9442307)
Supplement: EMBR-23-e54128-s008.pdf [file EMBR-23-e54128-s008.pdf]

## **Appendix information**

Liu *et al.* LINC00839 promotes colorectal cancer progression by recruiting RUVBL1/Tip60 complex to activate NRF1

Table of contents:

Appendix Table S1. Page 2

Appendix Table S2. Page 3

Appendix Table S3. Page 4

Appendix Table S4. Page 5

Appendix Table S1. Correlation between the Colorectal cancer features and expression of LINC00839

| Clinicopathological variables | LINC00839 expression |                          |                           | P-value | $\chi^2$ |
|-------------------------------|----------------------|--------------------------|---------------------------|---------|----------|
|                               | Total                | No. of low expression(%) | No. of high expression(%) |         |          |
| <b>Gender</b>                 |                      |                          |                           |         |          |
| Male                          | 130                  | 62 (47.69)               | 68 (52.30)                | 0.889   | 0.02     |
| Female                        | 92                   | 43 (46.73)               | 49 (53.26)                |         |          |
| <b>Ages (years)</b>           |                      |                          |                           |         |          |
| ≤50                           | 60                   | 27 (43.33)               | 33 (56.67)                | 0.677   | 0.174    |
| >50                           | 162                  | 78 (48.76)               | 84 (51.23)                |         |          |
| <b>Tumor site</b>             |                      |                          |                           |         |          |
| Proximal                      | 43                   | 19 (35.41)               | 24 (64.58)                | 0.517   | 5.925    |
| Distal colon                  | 52                   | 24 (44.73)               | 28 (55.26)                |         |          |
| Rectum                        | 127                  | 62 (52.20)               | 65 (47.79)                |         |          |
| <b>Tumor size (cm)</b>        |                      |                          |                           |         |          |
| ≤5cm                          | 138                  | 63 (53.33)               | 75 (46.67)                | 0.529   | 0.396    |
| >5cm                          | 84                   | 42 (60.09)               | 42 (39.08)                |         |          |
| <b>Tumor differentiation</b>  |                      |                          |                           |         |          |
| Well                          | 81                   | 35 (66.23)               | 45 (33.77)                | 0.5142  | 1.33     |
| Moderate                      | 93                   | 46 (47.31)               | 47 (52.69)                |         |          |
| Poor                          | 41                   | 24 (19.2)                | 25 (80.76)                |         |          |
| <b>T stage</b>                |                      |                          |                           |         |          |
| T1-2                          | 92                   | 55 (61.96)               | 37 (38.04)                | 9.825   | 0.002    |
| T3-4                          | 130                  | 50 (36.92)               | 80 (63.08)                |         |          |
| <b>Lymph node involvement</b> |                      |                          |                           |         |          |
| No                            | 91                   | 50 (58.82)               | 41 (41.17)                | 0.047   | 3.94     |
| Yes                           | 131                  | 55 (39.85)               | 76 (60.14)                |         |          |
| <b>Distant</b>                |                      |                          |                           |         |          |
| No                            | 204                  | 103 (56.86)              | 101 (43.13)               | 0.001   | 10.29    |
| Yes                           | 18                   | 2 (33.33)                | 16 (66.67)                |         |          |
| <b>Clinical stage</b>         |                      |                          |                           |         |          |
| I + II                        | 74                   | 43 (61.95)               | 31 (38.04)                | 0.023   | 5.204    |
| III+IV                        | 148                  | 62 (36.92)               | 86 (63.07)                |         |          |

Appendix Table S2. Sequences of shRNA used in this study

| <b>Gene</b>          | <b>primer</b>                |
|----------------------|------------------------------|
| LINC00839-Homo-37    | 5'-AAAUGCGGAAAGCCCACGGTT-3'  |
| LINC00839-Homo-747#1 | 5'-AUUUCAGGUGUCUUGAUGGTT-3'  |
| LINC00839-Homo-952#2 | 5'-AUUGUAGCUGGUCAUCCGCTT-3'  |
| LINC00839-Homo-1112  | 5'-JUUAUGGUCAGUUUAAGGCTT-3'  |
| RVB1#1               | 5'-UGCCGUGGCUGAGGCUCAUTT -3' |
| RVB1#2               | 5'-CCACAGAATTCGACCUAGA-3'    |
| NRF1#1               | 5'-UUAAGCGCCAUAUGUGACUG-3'   |
| NRF1#2               | 5'-AGUUUCCGAAGCAAACGUG-3'    |

Appendix table S3. Primer pairs used in this study

| Gene          | primer                                                |
|---------------|-------------------------------------------------------|
| LINC00839-F   | 5'-ATGTGACGTGCTCCTGATGG-3'                            |
| LINC00839-R   | 5'-CAGGCCACTCATGCTGTTGT-3'                            |
| GAPDH-F       | 5'-ACAGTCAGCCGCATCTTCTT-3'                            |
| GAPDH-R       | 5'-GACAAGCTTCCCGTTCTCAG-3'                            |
| NRF1-1-F      | 5'-AAACCTCTGAAGCGCTCCGT-3'                            |
| NRF1-1-R      | 5'-CCATGATGAGGAGGTCGGC-3'                             |
| NRF1-2-F      | 5'-GAGAGATGCCACTCGTCTGA-3'                            |
| NRF1-2-R      | 5'-CGGAACCTCAAAGCAACTGG-3'                            |
| NRF1-3-F      | 5'-AGATAGGAAAGCAGAGGTCATTTC-3'                        |
| NRF1-3-R      | 5'-CAAGTGGTTCCCCTCTGGTTTT-3'                          |
| NRF1-4-F      | 5'-TGCTTCGAATAAGCTCCGTG-3'                            |
| NRF1-4-R      | 5'-CGTGCTGTGCCAGATATTGT-3'                            |
| NRF1-5-F      | 5'-GGGTCCCAGGACTCAAACA-3'                             |
| NRF1-5-R      | 5'-GGCAGAGGGGTCGTTTTTGT-3'                            |
| NRF1-6-F      | 5'-GTTAATCCGTTTTCTGACACCCT-3'                         |
| NRF1-6-R      | 5'-GCTTGTTTGCCCTAGGAACCTG-3'                          |
| NRF1-7-F      | 5'-GGATCATTTCAGGTTTCTGGC-3'                           |
| NRF1-7-R      | 5'-TCCAGTGTTTTCTAGGAGAGTGC-3'                         |
| NRF1-8-F      | 5'-TGGAGAGGGCAATTTCCGGTG-3'                           |
| NRF1-8-R      | 5'-GCACCCAGCCCAATTAGA-3'                              |
| NRF1-9-F      | 5'-ATCACCAATGGCCCTGTAGC-3'                            |
| NRF1-9-R      | 5'-TCCACTACAGCTTGAATGGTCT-3'                          |
| NRF1-10-F     | 5'-AACAGTTGTGAGGTGGCACA-3'                            |
| NRF1-10-R     | 5'-TGACCTCATCTGCCACAGATATT-3'                         |
| LINC00839-1-F | 5'-GATATCTAGTTAAATAAGTCATTATAAATAGTTGCTCC-3'          |
| LINC00839-1-R | 5'-CATGACAAGATTTTCAGGTGTCTTG-3'                       |
| LINC00839-2-F | 5'-TAATACGACTCACTATAGGGAGCCAGATACTGAGGAAGAGATTTTGG-3' |
| LINC00839-2-R | 5'-AGACCCCAACCCAGTGGTG-3'                             |
| LINC00839-3-F | 5'-TAATACGACTCACTATAGGGCCTTGACCAAGCTGGTCT-3'          |
| LINC00839-3-R | 5'-TTTTTTTTTTTTTTTTTTAGAGGTGTCAAGTG-3'                |
| LINC00839-4-F | 5'-TAATACGACTCACTATAGGGAGCCAGATACTGAGGAAGAGATTTTGG-3' |
| LINC00839-4-R | 5'-TCGTCATGGTGGGCTACTTCTC-3'                          |
| LINC00839-5-F | 5'-TAATACGACTCACTATAGGGAGCTGCCTTTGCTTTTATCGCT-3'      |
| LINC00839-5-R | 5'-TGTTGTTAAGGCTCAGGCCACT-3'                          |
| LINC00839-6-F | 5'-TAATACGACTCACTATAGGGTGTTTTTGCTGCAGATAATCGGC-3'     |
| LINC00839-6-R | 5'-AGACCCCAACCCAGTGGTG-3'                             |

Appendix table S4. ChiRP-Probe

| ChiRP-LINC00839-Probe    | ChiRP-LacZ-Probe         | ChiRP-TERCProbe          |
|--------------------------|--------------------------|--------------------------|
| ACGCTGCCTGGAGCAGGGTG-bio | CTGAATATCGACGGTTTCCA-bio | CAGGCCACCCCTCCGCAACC-bio |
| CAGTTCTCTTCCTTCTCCTC-bio | GCTGTATCGCTGGATCAAAT-bio | GCAAAAGCACGGCGCCTACG-bio |
| GGTTCTGGGAGGAGGCGCAG-bio | GTCGTTTTACAACGTCGTGA-bio | CTCTAGAATGAACGGTGGAA-bio |
| GCTGTTGCTGCGTCACTGCC-bio |                          | GCCTCCAGGCGGGGTTCCGG-bio |
| CCCAACCCAGTAGTGCCTCG-bio |                          | GGCTGACAGAGCCCAACTCT-bio |
| AAGAGTACTCTGGTGCCTC-bio  |                          | GGGACTCGTCCGTTCTCT-bio   |
| TGTCAGTCTTGACATGGCTG-bio |                          | CAGGAAAGCGAACTGCATGT-bio |
| CTCATTGTAGCTGGTCATCC-bio |                          | AGGTTTGGGGTTCACAAGC-bio  |
| ATGACAGGCTTAGGGCCTGT-bio |                          |                          |
| CCAGGTGTTCCCTACCCTGC-bio |                          |                          |
| GCATACTTAGAGAGGAGTAG-bio |                          |                          |
| AGTGCAAAGTGGGAATCAGG-bio |                          |                          |
| TACCCACAGGCTCCACAAGG-bio |                          |                          |
| GTGCAGGTCCACTTACAGAG-bio |                          |                          |
| CCTGCTCCCAACAGCCCTCA-bio |                          |                          |
| CCAGGTGTTCCCTGCCCTCA-bio |                          |                          |
| GAAACGAAGGGATGGACTGA-bio |                          |                          |
| GGTCTCACAGCCTTCAGAGT-bio |                          |                          |
