# Supplementary material
Source: PubMed Central journal article supplement (PMC9442307)

Fig 4

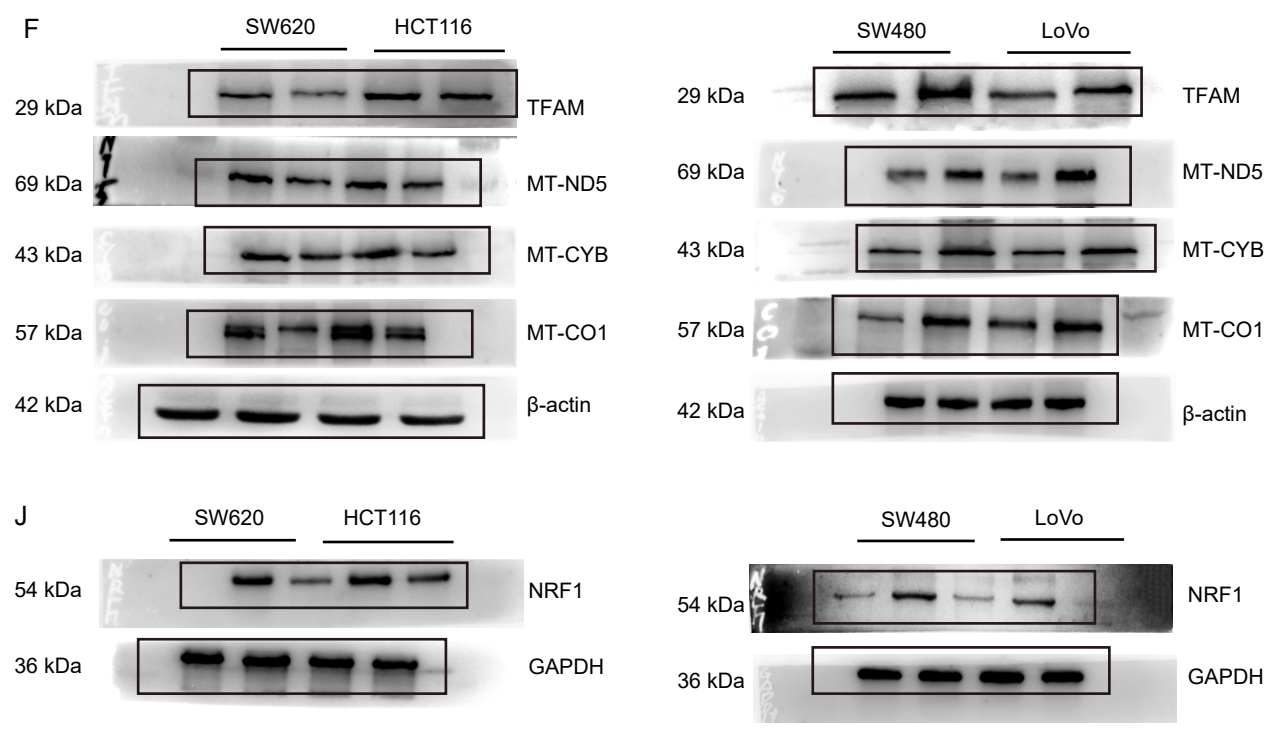

Supplement: EMBR-23-e54128-s003.pdf [file EMBR-23-e54128-s003.pdf]

Fig 5

C

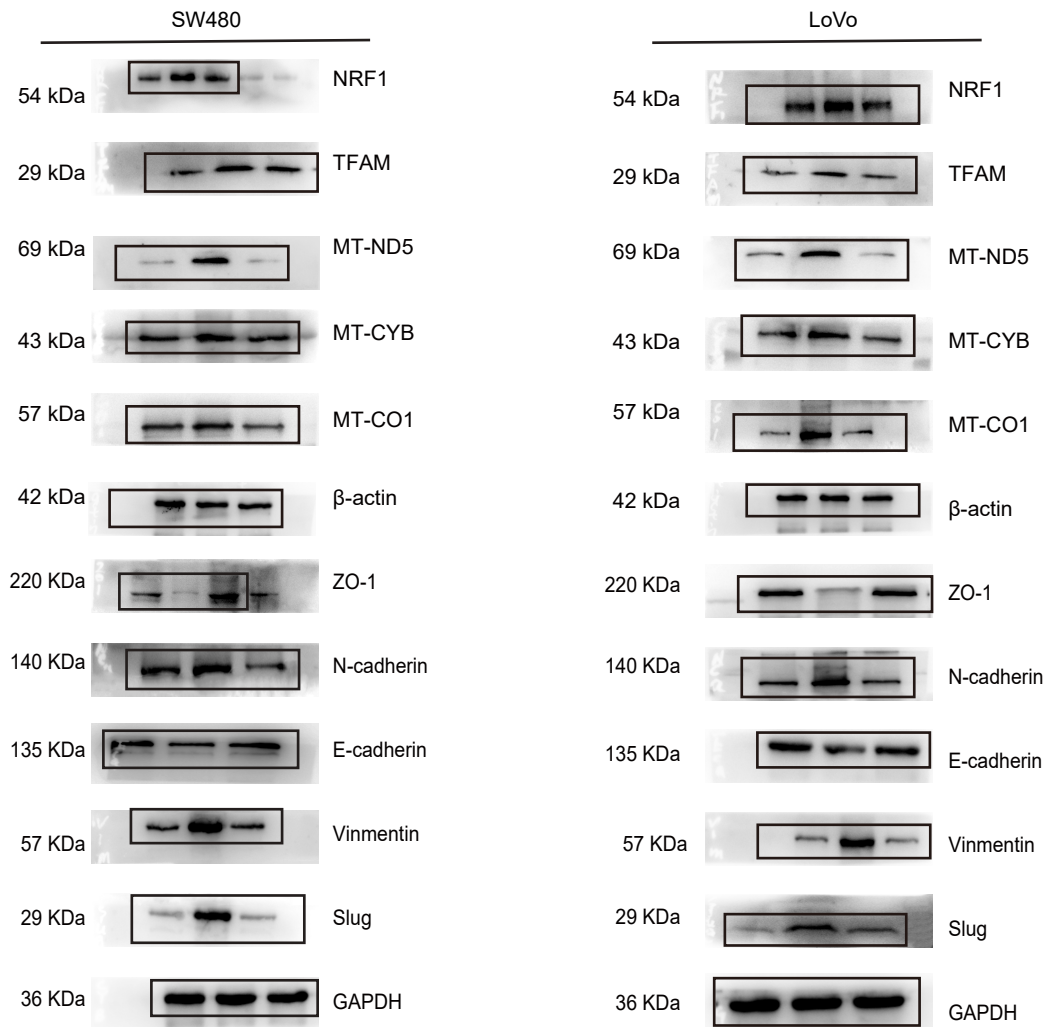

Supplement: EMBR-23-e54128-s006.pdf [file EMBR-23-e54128-s006.pdf]

Fig 3

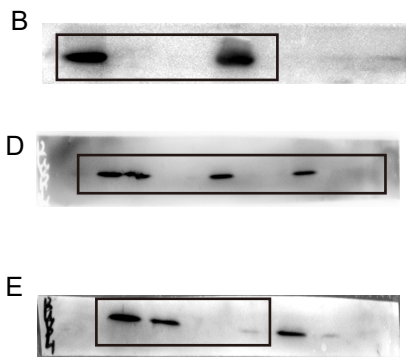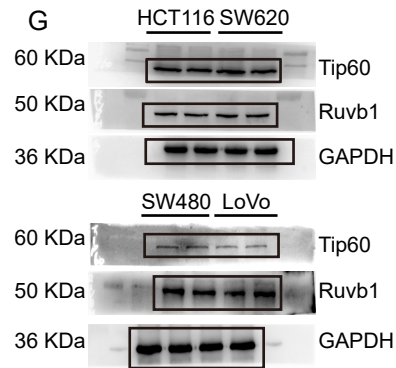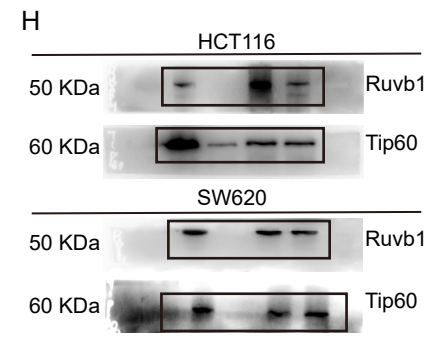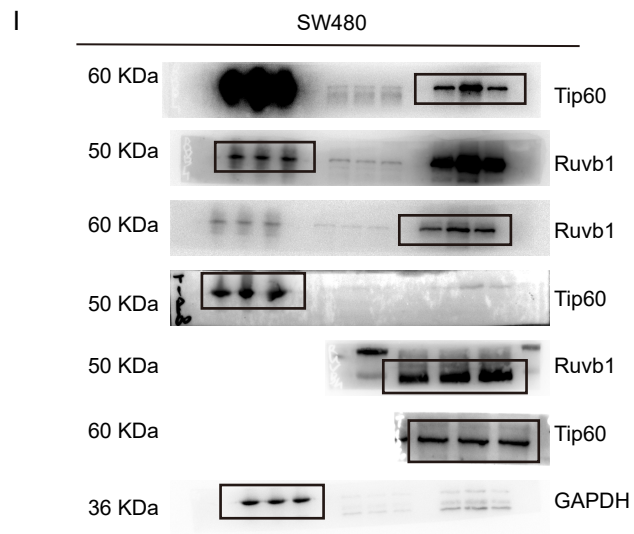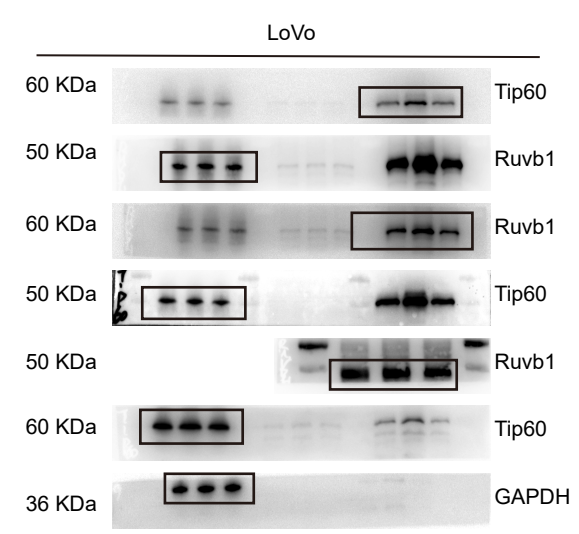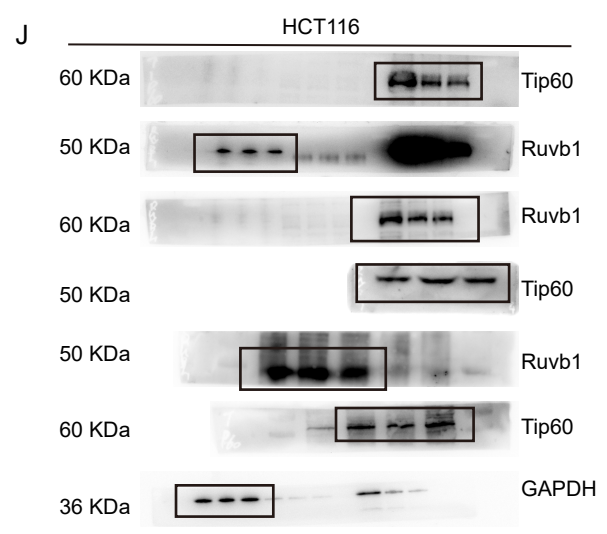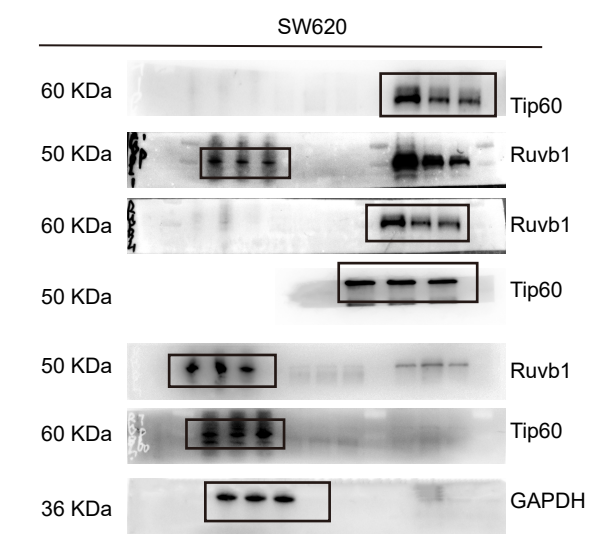

Supplement: EMBR-23-e54128-s007.pdf [file EMBR-23-e54128-s007.pdf]
